# Supplementary material for: Widespread expression of the ancient HERV-K (HML-2) provirus group in normal human tissues
Source: PubMed Central journal article supplement (PMC9578601; doi:10.1371/journal.pbio.3001826), 2022-10-18
Supplement: pbio.3001826.s001.pdf [file pbio.3001826.s001.pdf]

### Average Expression of HML-2 proviruses in 2 GTEx Donors

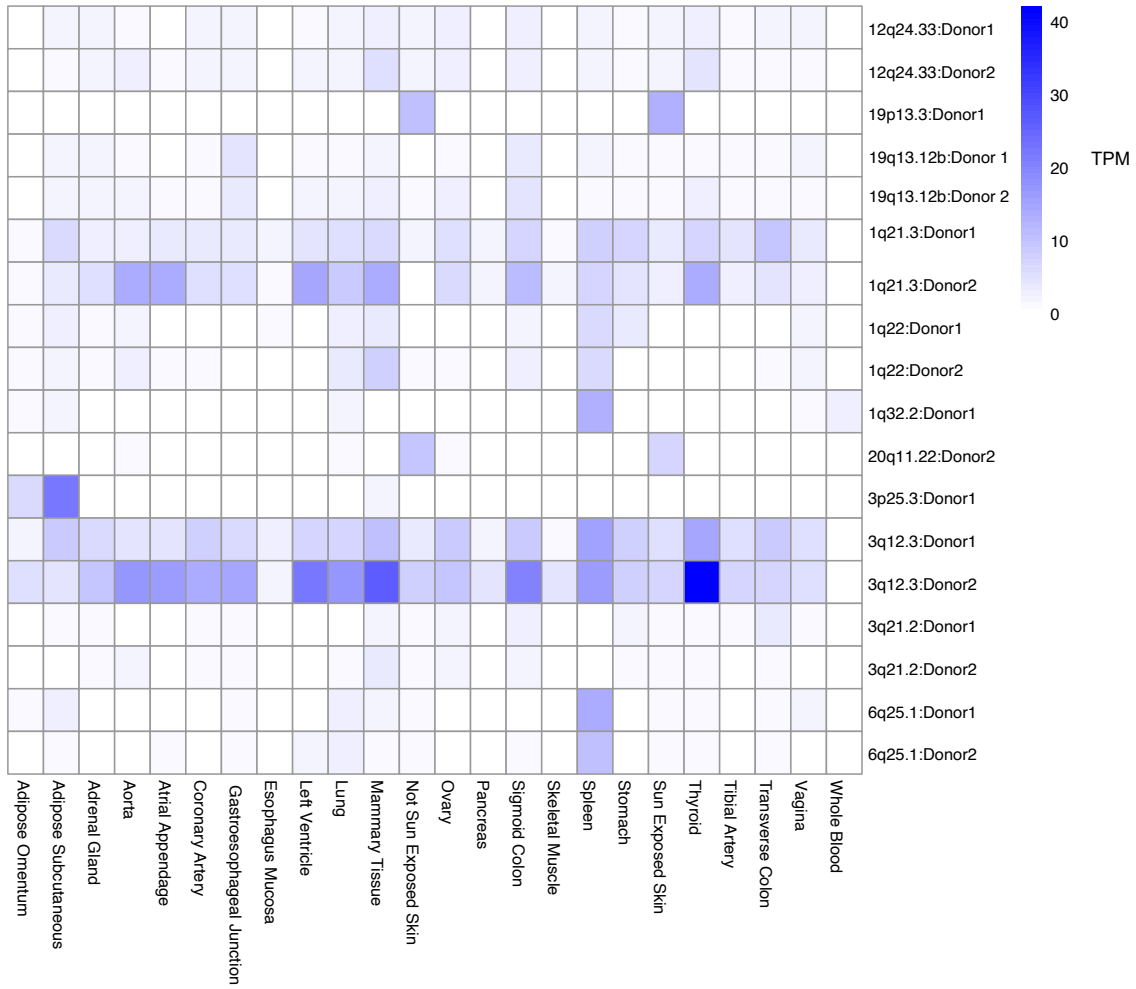

### Supplemental Figure 1. Comparison of individual donors

This figure displays a heatmap of individual HML-2 expression from two female GTEx donors. Provirus expression is given in TPM for each provirus detected (10 in Donor 1 and 8 in Donor 2) for 22 body sites. Each provirus is labeled on the side with which donor it was measured in. This heatmap was made using data from S2\_Data.
